# Supplementary material
Source: PubMed Central journal article supplement (PMC4719600)
Supplement: JVI.01904-15_zjv999091242so1.pdf [file JVI.01904-15_zjv999091242so1.pdf]

1 **SUPPLEMENTARY FIGURE LEGENDS**

2 **Supplementary Fig S1 Original multiple alignment of ERV-DC7 isolated from 22**

3 **cats.** The regions corresponding to Refrex-1 ORF and consensus *env* gene are

4 highlighted in blue and light blue, respectively. Negative values indicate the upstream

5 region of *env*.

# Supplementary Figure S1

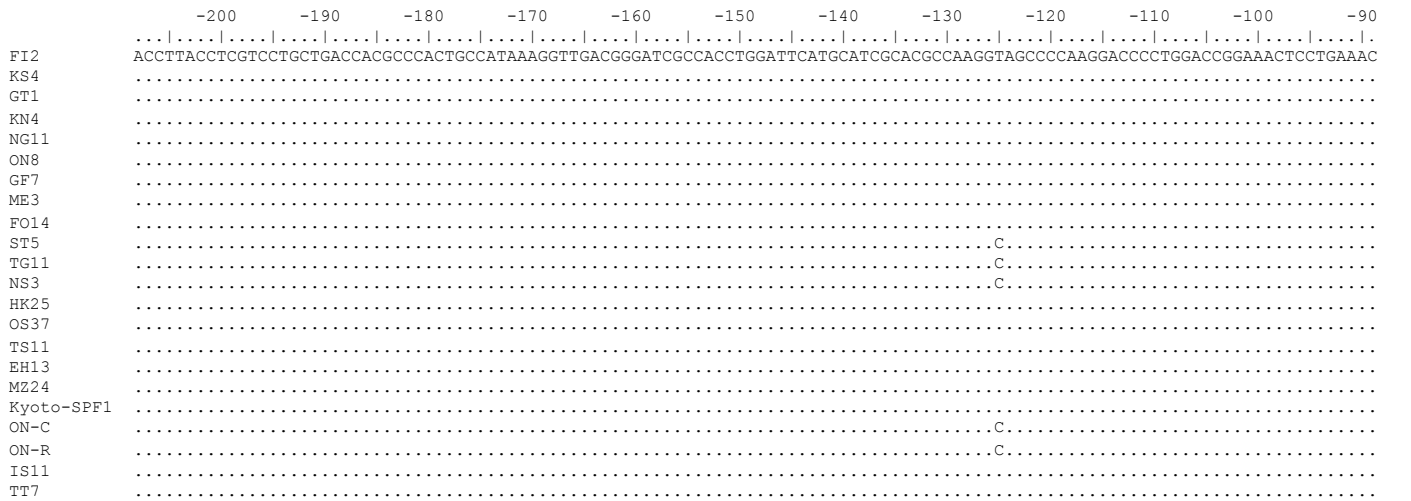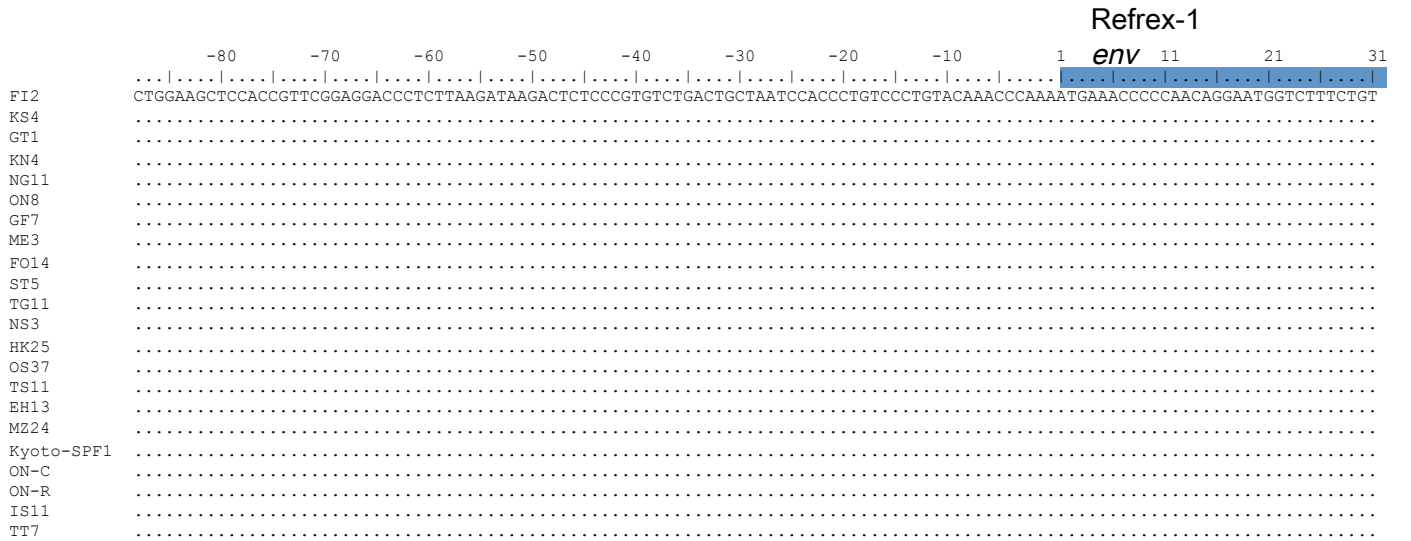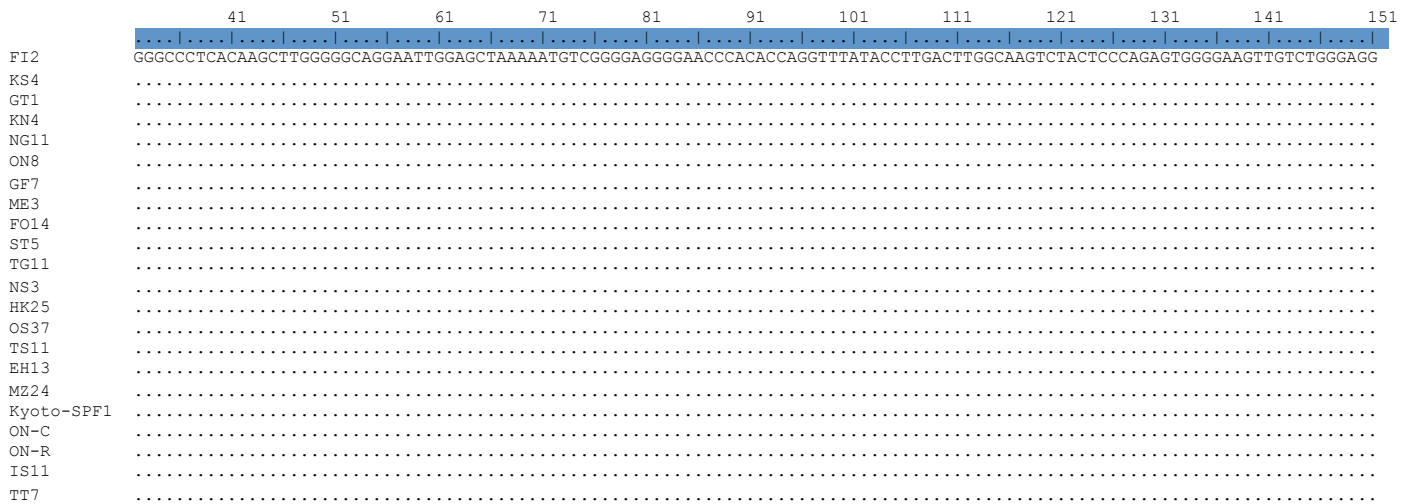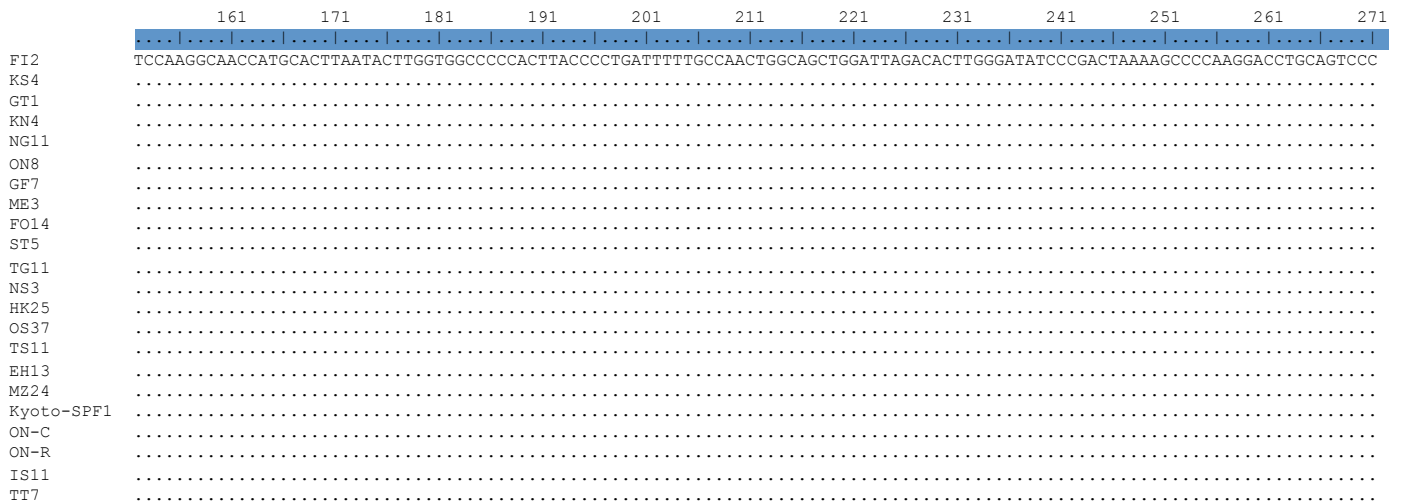

# Supplementary Figure S1

281 291 301 311 321 331 341 351 361 371 381 391

FI2 ACATGGGGGAAAGAACCCAACAGATGACTGCCCATGGATGCAGTAGTCCCCTGCCAGATGTAGATTAGCCCAGGCAGAATTCTATGTCTGCCCTCGAGACAATAGAGATAGGGCCACTG  
KS4 .....  
GT1 .....  
KN4 .....  
NG11 .....  
ON8 .....  
GF7 .....  
ME3 .....  
FO14 .....  
ST5 .....  
TG11 .....  
NS3 .....  
HK25 .....  
OS37 .....  
TS11 .....  
EH13 .....  
MZ24 .....  
Kyoto-SPF1 .....  
ON-C .....G  
ON-R .....G  
IS11 .....  
TT7 .....

401 411 421 431 441 451 461 471 481 491 501 511

FI2 CACACCGATGTGGGGATATGAAGAATATTTCTGCTCGGCATGGGGCTGCGAACTACTGGCGATGCCTACTGGCAACCAACCTCTTCTTGGGACTTAATTACCATTACAAGAAATTACA  
KS4 .....  
GT1 .....  
KN4 .....  
NG11 .....  
ON8 .....  
GF7 .....  
ME3 .....  
FO14 .....  
ST5 .....  
TG11 .....  
NS3 .....  
HK25 .....  
OS37 .....  
TS11 .....  
EH13 .....  
MZ24 .....  
Kyoto-SPF1 .....  
ON-C ..T  
ON-R ..T  
IS11 .....  
TT7 .....

521 531 541 551 561 671 581 591 601 611 621 631

FI2 CTAAACCTGACCCGTGATGGACACACTTGCTACTATAAAAAAGGGCACTGAAGGGTATCATTATTGGGAAAGTCCCCTGTCCCTACCTCTTAAGATTACCTTTACAGACTCAGGAAAACGGG  
KS4 .....  
GT1 .....  
KN4 .....  
NG11 .....  
ON8 .....  
GF7 .....  
ME3 .....  
FO14 .....  
ST5 .....  
TG11 .....  
NS3 .....  
HK25 .....  
OS37 .....  
TS11 .....  
EH13 .....  
MZ24 .....  
Kyoto-SPF1 .....  
ON-C .....  
ON-R .....  
IS11 .....  
TT7 .....

641 651 661 671 681 691 701 711 721 731 741 751

FI2 CTCCTCGGATGGCAGACGGGCTATACATGGGGACTCCGATGGTATCTACCGGAAAAGATAGAGGAGTTGTTCTAAAAATAAAATAAAATAGATACCATCACCCAAACCGTAGGCCCAA  
KS4 .....  
GT1 .....  
KN4 .....  
NG11 .....  
ON8 .....  
GF7 .....  
ME3 .....  
FO14 .....  
ST5 .....  
TG11 .....  
NS3 .....  
HK25 .....  
OS37 .....  
TS11 .....  
EH13 .....  
MZ24 .....  
Kyoto-SPF1 .....  
ON-C .....  
ON-R .....  
IS11 .....  
TT7 .....

# Supplementary Figure S1

*env*

|            | 761                                                                                                                      | 771 | 781 | 791 | 801 | 811 | 821 | 831 | 841 | 851 | 861 | 871 |
|------------|--------------------------------------------------------------------------------------------------------------------------|-----|-----|-----|-----|-----|-----|-----|-----|-----|-----|-----|
| FI2        | CCTAGTATTGGCCGATCAAAAAGGCCCGGTCCAGCTAGCCATCCCAGTCTAGCCACCAAGGGCCCAACTCAGACACCGAGGGTCAACCCCTGCTAATTCCACTCTAAGCCCTAATCTAGG |     |     |     |     |     |     |     |     |     |     |     |
| KS4        | .....                                                                                                                    |     |     |     |     |     |     |     |     |     |     |     |
| GT1        | .....                                                                                                                    |     |     |     |     |     |     |     |     |     |     |     |
| KN4        | .....                                                                                                                    |     |     |     |     |     |     |     |     |     |     |     |
| NG11       | .....                                                                                                                    |     |     |     |     |     |     |     |     |     |     |     |
| ON8        | .....                                                                                                                    |     |     |     |     |     |     |     |     |     |     |     |
| GF7        | .....                                                                                                                    |     |     |     |     |     |     |     |     |     |     |     |
| ME3        | .....                                                                                                                    |     |     |     |     |     |     |     |     |     |     |     |
| FO14       | .....                                                                                                                    |     |     |     |     |     |     |     |     |     |     |     |
| ST5        | .....                                                                                                                    |     |     |     |     |     |     |     |     |     |     |     |
| TG11       | .....                                                                                                                    |     |     |     |     |     |     |     |     |     |     |     |
| NS3        | .....                                                                                                                    |     |     |     |     |     |     |     |     |     |     |     |
| HK25       | .....                                                                                                                    |     |     |     |     |     |     |     |     |     |     |     |
| OS37       | .....                                                                                                                    |     |     |     |     |     |     |     |     |     |     |     |
| TS11       | .....                                                                                                                    |     |     |     |     |     |     |     |     |     |     |     |
| EH13       | .....                                                                                                                    |     |     |     |     |     |     |     |     |     |     |     |
| MZ24       | .....                                                                                                                    |     |     |     |     |     |     |     |     |     |     |     |
| Kyoto-SPF1 | .....                                                                                                                    |     |     |     |     |     |     |     |     |     |     |     |
| ON-C       | .....C.....                                                                                                              |     |     |     |     |     |     |     |     |     |     |     |
| ON-R       | .....C.....                                                                                                              |     |     |     |     |     |     |     |     |     |     |     |
| IS11       | .....                                                                                                                    |     |     |     |     |     |     |     |     |     |     |     |
| TT7        | .....                                                                                                                    |     |     |     |     |     |     |     |     |     |     |     |

|            | 881                                                                                                                     | 891 | 901 | 911 | 921 | 931 | 941 | 951 | 961 | 971 | 981 | 991 |
|------------|-------------------------------------------------------------------------------------------------------------------------|-----|-----|-----|-----|-----|-----|-----|-----|-----|-----|-----|
| FI2        | ACACCCAACCTCCCCCTCTCGACCGGGCAGGGAGACAGACTCCTAAACCTTGTACAAGGGGTATACTTAACCTCTCGACCTCAGGGCCCAATCAAACCTCAGAACTGTTGGCTCTGCCT |     |     |     |     |     |     |     |     |     |     |     |
| KS4        | .....                                                                                                                   |     |     |     |     |     |     |     |     |     |     |     |
| GT1        | .....                                                                                                                   |     |     |     |     |     |     |     |     |     |     |     |
| KN4        | .....A.....                                                                                                             |     |     |     |     |     |     |     |     |     |     |     |
| NG11       | .....A.....                                                                                                             |     |     |     |     |     |     |     |     |     |     |     |
| ON8        | .....A.....                                                                                                             |     |     |     |     |     |     |     |     |     |     |     |
| GF7        | .....A.....                                                                                                             |     |     |     |     |     |     |     |     |     |     |     |
| ME3        | .....A.....                                                                                                             |     |     |     |     |     |     |     |     |     |     |     |
| FO14       | .....A.....                                                                                                             |     |     |     |     |     |     |     |     |     |     |     |
| ST5        | .....A.....                                                                                                             |     |     |     |     |     |     |     |     |     |     |     |
| TG11       | .....A.....                                                                                                             |     |     |     |     |     |     |     |     |     |     |     |
| NS3        | .....A.....                                                                                                             |     |     |     |     |     |     |     |     |     |     |     |
| HK25       | .....A.....                                                                                                             |     |     |     |     |     |     |     |     |     |     |     |
| OS37       | .....A.....                                                                                                             |     |     |     |     |     |     |     |     |     |     |     |
| TS11       | .....A.....                                                                                                             |     |     |     |     |     |     |     |     |     |     |     |
| EH13       | .....A.....                                                                                                             |     |     |     |     |     |     |     |     |     |     |     |
| MZ24       | .....A.....                                                                                                             |     |     |     |     |     |     |     |     |     |     |     |
| Kyoto-SPF1 | .....A.....                                                                                                             |     |     |     |     |     |     |     |     |     |     |     |
| ON-C       | .....                                                                                                                   |     |     |     |     |     |     |     |     |     |     |     |
| ON-R       | .....                                                                                                                   |     |     |     |     |     |     |     |     |     |     |     |
| IS11       | .....A.....                                                                                                             |     |     |     |     |     |     |     |     |     |     |     |
| TT7        | .....A.....                                                                                                             |     |     |     |     |     |     |     |     |     |     |     |

|            | 1001                                                                                                                    | 1011 | 1021 | 1031 | 1041 | 1051 | 1061 | 1071 | 1081 | 1091 | 1101 | 1111 |
|------------|-------------------------------------------------------------------------------------------------------------------------|------|------|------|------|------|------|------|------|------|------|------|
| FI2        | AACTGCTAAACCCCTTACTATCAGGGAGTTGCTATAATTGGAAATTTTACTAACCACACTAATGCCCACTGAAATGTAGCACTACACCTCGACACGGCCCTCACTCTAACTGAAGTCAC |      |      |      |      |      |      |      |      |      |      |      |
| KS4        | .....                                                                                                                   |      |      |      |      |      |      |      |      |      |      |      |
| GT1        | .....                                                                                                                   |      |      |      |      |      |      |      |      |      |      |      |
| KN4        | .....                                                                                                                   |      |      |      |      |      |      |      |      |      |      |      |
| NG11       | .....                                                                                                                   |      |      |      |      |      |      |      |      |      |      |      |
| ON8        | .....                                                                                                                   |      |      |      |      |      |      |      |      |      |      |      |
| GF7        | .....                                                                                                                   |      |      |      |      |      |      |      |      |      |      |      |
| ME3        | .....                                                                                                                   |      |      |      |      |      |      |      |      |      |      |      |
| FO14       | .....                                                                                                                   |      |      |      |      |      |      |      |      |      |      |      |
| ST5        | .....                                                                                                                   |      |      |      |      |      |      |      |      |      |      |      |
| TG11       | .....                                                                                                                   |      |      |      |      |      |      |      |      |      |      |      |
| NS3        | .....                                                                                                                   |      |      |      |      |      |      |      |      |      |      |      |
| HK25       | .....                                                                                                                   |      |      |      |      |      |      |      |      |      |      |      |
| OS37       | .....                                                                                                                   |      |      |      |      |      |      |      |      |      |      |      |
| TS11       | .....                                                                                                                   |      |      |      |      |      |      |      |      |      |      |      |
| EH13       | .....                                                                                                                   |      |      |      |      |      |      |      |      |      |      |      |
| MZ24       | .....                                                                                                                   |      |      |      |      |      |      |      |      |      |      |      |
| Kyoto-SPF1 | .....                                                                                                                   |      |      |      |      |      |      |      |      |      |      |      |
| ON-C       | .....                                                                                                                   |      |      |      |      |      |      |      |      |      |      |      |
| ON-R       | .....                                                                                                                   |      |      |      |      |      |      |      |      |      |      |      |
| IS11       | .....                                                                                                                   |      |      |      |      |      |      |      |      |      |      |      |
| TT7        | .....                                                                                                                   |      |      |      |      |      |      |      |      |      |      |      |

|            | 1121                                                                                                                   | 1131 | 1141 | 1151 | 1161 | 1171 | 1181 | 1191 | 1201 | 1211 | 1221 | 1231 |
|------------|------------------------------------------------------------------------------------------------------------------------|------|------|------|------|------|------|------|------|------|------|------|
| FI2        | CGGCCAAGGCTTATGCATTGGCAAAGTCCCCCTCACACCAGAATCTCTGCAGCCAGACCGTAACATCAGTCGGGCAGGGCCCTATTATTTGACCGCTCCCAACGGAACATACATGGGT |      |      |      |      |      |      |      |      |      |      |      |
| KS4        | .....                                                                                                                  |      |      |      |      |      |      |      |      |      |      |      |
| GT1        | .....                                                                                                                  |      |      |      |      |      |      |      |      |      |      |      |
| KN4        | .....A.....                                                                                                            |      |      |      |      |      |      |      |      |      |      |      |
| NG11       | .....A.....                                                                                                            |      |      |      |      |      |      |      |      |      |      |      |
| ON8        | .....A.....                                                                                                            |      |      |      |      |      |      |      |      |      |      |      |
| GF7        | .....A.....                                                                                                            |      |      |      |      |      |      |      |      |      |      |      |
| ME3        | .....A.....                                                                                                            |      |      |      |      |      |      |      |      |      |      |      |
| FO14       | .....A.....                                                                                                            |      |      |      |      |      |      |      |      |      |      |      |
| ST5        | .....A.....                                                                                                            |      |      |      |      |      |      |      |      |      |      |      |
| TG11       | .....A.....                                                                                                            |      |      |      |      |      |      |      |      |      |      |      |
| NS3        | .....A.....                                                                                                            |      |      |      |      |      |      |      |      |      |      |      |
| HK25       | .....A.....                                                                                                            |      |      |      |      |      |      |      |      |      |      |      |
| OS37       | .....A.....                                                                                                            |      |      |      |      |      |      |      |      |      |      |      |
| TS11       | .....A.....                                                                                                            |      |      |      |      |      |      |      |      |      |      |      |
| EH13       | .....A.....                                                                                                            |      |      |      |      |      |      |      |      |      |      |      |
| MZ24       | .....A.....                                                                                                            |      |      |      |      |      |      |      |      |      |      |      |
| Kyoto-SPF1 | .....A.....                                                                                                            |      |      |      |      |      |      |      |      |      |      |      |
| ON-C       | .....A.....                                                                                                            |      |      |      |      |      |      |      |      |      |      |      |
| ON-R       | .....A.....                                                                                                            |      |      |      |      |      |      |      |      |      |      |      |
| IS11       | .....A.....                                                                                                            |      |      |      |      |      |      |      |      |      |      |      |
| TT7        | .....A.....                                                                                                            |      |      |      |      |      |      |      |      |      |      |      |



# Supplementary Figure S1

|            | 1721                                                                                                                     | 1731 | 1741 | 1751 | 1761 | 1771 | 1781 | 1791 | 1801 | 1811 | 1821 | 1831 |
|------------|--------------------------------------------------------------------------------------------------------------------------|------|------|------|------|------|------|------|------|------|------|------|
| FI2        | GAGGGAAAGACTCAAACAGAGACAAAAGCTGTTTCGAATCTCAACAAGGCTGGTTTGAGGGATGGTATAACAAATCCCCTGGTTTACCACTCTAGTCTCCTCCCTCATAGGCCCTTAAAT |      |      |      |      |      |      |      |      |      |      |      |
| KS4        | .....                                                                                                                    |      |      |      |      |      |      |      |      |      |      |      |
| GT1        | .....                                                                                                                    |      |      |      |      |      |      |      |      |      |      |      |
| KN4        | .....                                                                                                                    |      |      |      |      |      |      |      |      |      |      |      |
| NG11       | .....                                                                                                                    |      |      |      |      |      |      |      |      |      |      |      |
| ON8        | .....                                                                                                                    |      |      |      |      |      |      |      |      |      |      |      |
| GF7        | .....                                                                                                                    |      |      |      |      |      |      |      |      |      |      |      |
| ME3        | .....                                                                                                                    |      |      |      |      |      |      |      |      |      |      |      |
| FO14       | .....                                                                                                                    |      |      |      |      |      |      |      |      |      |      |      |
| ST5        | .....G.....                                                                                                              |      |      |      |      |      |      |      |      |      |      |      |
| TG11       | .....G.....                                                                                                              |      |      |      |      |      |      |      |      |      |      |      |
| NS3        | .....G.....                                                                                                              |      |      |      |      |      |      |      |      |      |      |      |
| HK25       | .....                                                                                                                    |      |      |      |      |      |      |      |      |      |      |      |
| OS37       | .....                                                                                                                    |      |      |      |      |      |      |      |      |      |      |      |
| TS11       | .....                                                                                                                    |      |      |      |      |      |      |      |      |      |      |      |
| EH13       | .....                                                                                                                    |      |      |      |      |      |      |      |      |      |      |      |
| MZ24       | .....                                                                                                                    |      |      |      |      |      |      |      |      |      |      |      |
| Kyoto-SPF1 | .....                                                                                                                    |      |      |      |      |      |      |      |      |      |      |      |
| ON-C       | .....A.....                                                                                                              |      |      |      |      |      |      |      |      |      |      |      |
| ON-R       | .....A.....                                                                                                              |      |      |      |      |      |      |      |      |      |      |      |
| IS11       | .....                                                                                                                    |      |      |      |      |      |      |      |      |      |      |      |
| TT7        | .....                                                                                                                    |      |      |      |      |      |      |      |      |      |      |      |

|            | 1841                                                                                                                  | 1851 | 1861 | 1871 | 1881 | 1891 | 1901 | 1911 | 1921 | 1931 | 1941 | 1951 |
|------------|-----------------------------------------------------------------------------------------------------------------------|------|------|------|------|------|------|------|------|------|------|------|
| FI2        | ACTCCTACTATTAATACGTGTTCGGACCTTGCATCCTCAACCGCTTGGTACAATTCATAAGGGAGAGACTCTCTGTCATCCAGGCCTGGTCCTAACTCAACAGTACCACCAACTAAG |      |      |      |      |      |      |      |      |      |      |      |
| KS4        | .....                                                                                                                 |      |      |      |      |      |      |      |      |      |      |      |
| GT1        | .....                                                                                                                 |      |      |      |      |      |      |      |      |      |      |      |
| KN4        | .....                                                                                                                 |      |      |      |      |      |      |      |      |      |      |      |
| NG11       | .....                                                                                                                 |      |      |      |      |      |      |      |      |      |      |      |
| ON8        | .....                                                                                                                 |      |      |      |      |      |      |      |      |      |      |      |
| GF7        | .....                                                                                                                 |      |      |      |      |      |      |      |      |      |      |      |
| ME3        | .....                                                                                                                 |      |      |      |      |      |      |      |      |      |      |      |
| FO14       | .....                                                                                                                 |      |      |      |      |      |      |      |      |      |      |      |
| ST5        | .....                                                                                                                 |      |      |      |      |      |      |      |      |      |      |      |
| TG11       | .....                                                                                                                 |      |      |      |      |      |      |      |      |      |      |      |
| NS3        | .....                                                                                                                 |      |      |      |      |      |      |      |      |      |      |      |
| HK25       | .....                                                                                                                 |      |      |      |      |      |      |      |      |      |      |      |
| OS37       | .....                                                                                                                 |      |      |      |      |      |      |      |      |      |      |      |
| TS11       | .....                                                                                                                 |      |      |      |      |      |      |      |      |      |      |      |
| EH13       | .....                                                                                                                 |      |      |      |      |      |      |      |      |      |      |      |
| MZ24       | .....                                                                                                                 |      |      |      |      |      |      |      |      |      |      |      |
| Kyoto-SPF1 | .....                                                                                                                 |      |      |      |      |      |      |      |      |      |      |      |
| ON-C       | .....                                                                                                                 |      |      |      |      |      |      |      |      |      |      |      |
| ON-R       | .....                                                                                                                 |      |      |      |      |      |      |      |      |      |      |      |
| IS11       | .....                                                                                                                 |      |      |      |      |      |      |      |      |      |      |      |
| TT7        | .....                                                                                                                 |      |      |      |      |      |      |      |      |      |      |      |

|            | 1961                                  | 1971 | 1981 |
|------------|---------------------------------------|------|------|
| FI2        | ACAATTTGACACAGAAAGGCCAGATACAATCGAATGA |      |      |
| KS4        | .....                                 |      |      |
| GT1        | .....                                 |      |      |
| KN4        | .....                                 |      |      |
| NG11       | .....                                 |      |      |
| ON8        | .....                                 |      |      |
| GF7        | .....                                 |      |      |
| ME3        | .....                                 |      |      |
| FO14       | .....                                 |      |      |
| ST5        | .....                                 |      |      |
| TG11       | .....                                 |      |      |
| NS3        | .....                                 |      |      |
| HK25       | .....                                 |      |      |
| OS37       | .....                                 |      |      |
| TS11       | .....                                 |      |      |
| EH13       | .....                                 |      |      |
| MZ24       | .....                                 |      |      |
| Kyoto-SPF1 | .....                                 |      |      |
| ON-C       | .....                                 |      |      |
| ON-R       | .....                                 |      |      |
| IS11       | .....                                 |      |      |
| TT7        | .....                                 |      |      |

# Supplementary Table S1

## Sequences of primers used in this study.

| Primer                  | Sequence (5'-3')                                                |
|-------------------------|-----------------------------------------------------------------|
| Fe-207S                 | GGATCCGGATCCATGAAACCCCAACAGGAAT                                 |
| Fe-209S                 | GGATCCGGATCCATGAAACTCCCAACAGGAAT                                |
| Fe-246S                 | CATCACCCAAACCGTAGGTCCCAACCTAGTATTGGC                            |
| Fe-247S                 | CAGCTAGCCATCCCAGTCCAGCCACCAAGGGCC                               |
| Fe-248S                 | CTCAACTTCCCCCTCTCGACCGGGCACGGGAGAC                              |
| Fe-249S                 | CTCAACCTCACGGCCCCAAATCAAACCTCAGAGC                              |
| Fe-327S                 | AATTTCGAGCTCGGTACGGATCCATGAAACCCCAACAG                          |
| Fe-328S                 | GACCGGGCACAGGAGATAGGCTCC                                        |
| Fe-329S                 | GCCCCTATTATTTGACCGCTCCCA                                        |
| Fe-330S                 | TAGCACTGCTCCTAGGGGGATTAAC                                       |
| Fe-344S                 | ATTTGACCGCTCCCAACAGAACGTAAGGTTCTGT                              |
| Fe-345S                 | GCTCCAGGTAATCAATATTACTGCCGACTATTGCA                             |
| Fe-346S                 | GGTACTCAATAATACTACAGACTATTGCATCCTAAT                            |
| Fe-347S                 | GCCACTACGAACCCGGCAGCAGATTCCGGAGAGAA                             |
| Fe-358S                 | TCAATAATACTGCCGACGATTGCATCCTAATTGA                              |
| Fe-362S                 | ATTTGACCGCTCCCAACGGAACATACTGGGTCTGT                             |
| Fe-363S                 | TCAATACTACTACAGATTATTGCATCCTAATTGA                              |
| Fe-376S                 | CATTACGAACCCGGCGGCAGATTCCGGAGAG                                 |
| Fe-377S                 | TCAATGATACTGCCGACGATTGCATCCTAATTGA                              |
| Fe-378S                 | TCCAGGTAATCAATACTACTGCCGACTATTG                                 |
| Fe-379S                 | CTAGCCGCCCAATCGCACCTATTGGGCCT                                   |
| Fe-380S                 | AATTGGACCTCTGATGATTGTGTCTTAATCGA                                |
| Fe-382S                 | CTCCAGGTAATCAATATTACTACAGACTATTGCATCCTAATTG                     |
| FrMLV env 1S            | GGGAATTCATGGCGTGTCAACGCTCCC                                     |
| FrMLV mu1 S             | TCTAGTTGCCCAACAAGAACTACGTGGGCATG                                |
| FrMLV mu5 S             | TAATCGCACCACTGACGATTGCGTTCTCGTAG                                |
| KoRV env eco 1S         | GAATTCATGCTTCTCATCTCAAACCCGCGC                                  |
| KoRV mu1 S              | CCTCCTCCCCTCCAACCGCAGCTGGTGGGCTTG                               |
| KoRV mu5 S              | CCACCAGTCTAACGATGACTGTATCCAGATCCAGC                             |
| KoRV 3S                 | CCGAATTCATGCTTCTCATCTCAAACCCGCGC                                |
| Fe-218R                 | GCCAATACTAGGTTGGGACCTACGGTTGGGTGATG                             |
| Fe-219R                 | GGCCCTTGGTGGCTGGACTGGGATGGCTAGCTG                               |
| Fe-220R                 | GTCTCCCGTGCCCGGTCGAGAGGGGGAAGTTGAG                              |
| Fe-221R                 | GCTCTGAGTTTGATTTGGGGCCGTGAGGTTGAG                               |
| Fe-222R                 | CCGGATCCTCATTTCGATTGTATCTGGCC                                   |
| Fe-266R                 | GCCAAGCTTGCATGCCGATCCTCATTTCGATTGTATCTG                         |
| Fe-267R                 | TCTCCTGTGCCCGGTCGAGAGGG                                         |
| Fe-268R                 | GTCAAATAATAGGGGCCCTGCC                                          |
| Fe-269R                 | CCTAGGAGCAGTGCTACGGTGAG                                         |
| Fe-281R                 | ACAGACCCAGTACGTTCTGTTGGGAGCGGTCAAAT                             |
| Fe-282R                 | TGCAATAGTCGGCAGTAATATTGAGTACCTGGAGC                             |
| Fe-283R                 | ATTAGGATGCAATAGTCTGTAGTATTATTGAGTACC                            |
| Fe-284R                 | TTCTCTCCGGAATCTGCTGCCGGTTTCGTAGTGGC                             |
| Fe-395R                 | TCAATTAGGATGCAATCGTCGGCAGTATTATTGA                              |
| Fe-401R                 | ACAGACCCAGTATGTTCCGTTGGGAGCGGTCAAAT                             |
| Fe-402R                 | TCAATTAGGATGCAATAATCTGTAGTAGTATTGA                              |
| Fe-409R                 | CACACCGGAATCTGCCCGGGTTCGTAATG                                   |
| Fe-410R                 | TCAATTAGGATGCAATCGTCGGCAGTATCATTGA                              |
| Fe-411R                 | CAATAGTCGGCAGTAGTATTGAGTACCTGGA                                 |
| Fe-412R                 | AGGCCCAATAGGTGCGATTGGGGGCGGCTAG                                 |
| FrMLV env 1R            | CCGAATTCATGGCTCGTATTCTAGTG                                      |
| FrMLV mu1 R             | CATGCCACGTAGTTCTTGTGGGGGCAACTAGA                                |
| FrMLV mu5 R             | CTACGAGAACGCAATCGTCAGTGGTGCATTGA                                |
| KoRV env eco 1R         | GAATTCGGTAGCTCTAATCATAGAGCAGAA                                  |
| KoRV mu1 R              | CAAGCCCACCAGCTGCCGTTGGAGGGGAGGAGG                               |
| KoRV mu5 R              | GCTGGATCTGGATACAGTCATCGTTAGACTGGTTG                             |
| KoRV 4R                 | CCGAATTCCTACAGGCTTCTTTCAGAGATCAGTTTCTGTTTCGAGGTTATCCTCGTTGTCTAG |
| ERV-DC GI, II Env Myc R | CCGGATCCCTACAGGCTTCTTTCAGAGATCAGTTTCTGTTTCGATTGTATCTGGCCT       |
